# Supplementary material for: PER2 inhibits proliferation and stemness of glioma stem cells via the Wnt/β-catenin signaling pathway
Source: PubMed Central journal article supplement — Oncol Rep. 2020 May 27;44(2):533–42. doi: 10.3892/or.2020.7624 (PMC7336516; doi:10.3892/or.2020.7624), 2020-05-27

Figure S1. (A) Tumors that were harvested on day 15 after implantation. (B) CD133, NESTIN and SOX2 protein expression levels in PER2-overexpressed cells lines and control cell lines. (C) Representative images of the IHC serial sections of PER2 and CD133 membrane staining in a CD133-positive/PER2-low case and a CD133-negative/PER2-high case. Correlation of CD133 with expression of PER2 gene in 48 glioma cases was determined using  $\chi^2$  test. Two-tailed Student's t-test was used for statistical analysis of the results of A. \*P<0.05 vs. the control. PER2, period 2; GSCs, glioma stem cells; IHC, immunohistochemistry.

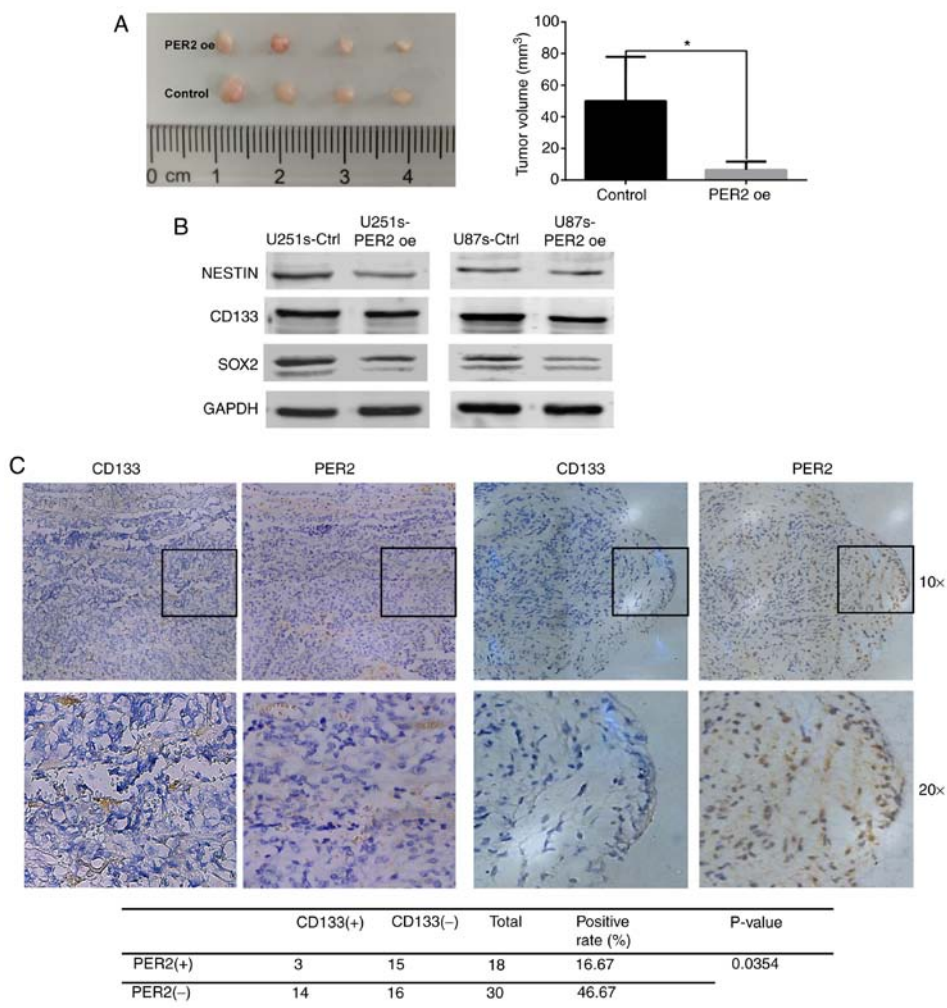

Figure S2. Gene expression profile of control and PER2-overexpressed U251 GSCs. Red, high level expression; blue: low level expression. PER2, period 2; GSCs, glioma stem cells.

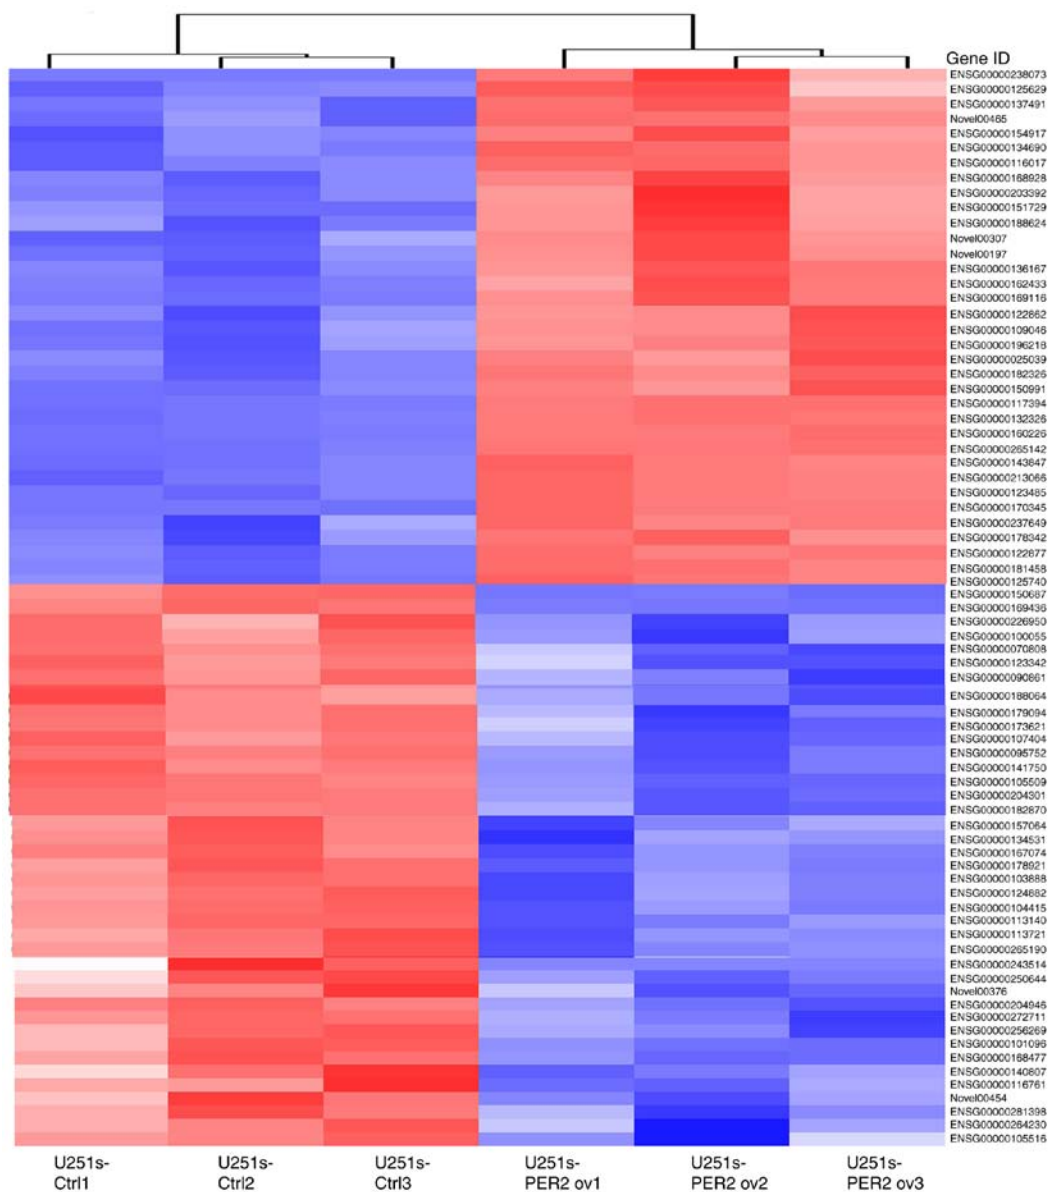

Supplement: Supplementary_Data.pdf [file Supplementary_Data.pdf]
